# Supplementary material
Source: PubMed Central journal article supplement (PMC6195867)

## SUPPLEMENTARY FIGURE LEGENDS

**Figure S1. PKC $\epsilon$  mediates activation of COX-2 pathway in normal prostate epithelial and prostate cancer cells.** (A) LNCaP cells were transfected with RNAi duplexes for PKC $\epsilon$  (#1 and #2) or NTC, and 48 h later treated with TNF $\alpha$  (10 ng/ml) for 4 h. PGE<sub>2</sub> levels in the culture medium were assessed by enzyme immuno assay. Results were normalized to NTC. (B) RWPE1 cells were infected with either PKC $\epsilon$  or control (LacZ) AdVs (MOI = 1 pfu/cell) and 24 h later treated with either LPS (5  $\mu$ g/ml) or TNF $\alpha$  (10 ng/ml) or vehicle for 4 h. *Left*: PKC $\epsilon$  and COX-2 protein levels as determined by Western blot. *Middle and right*: COX-2 mRNA levels determined by Q-PCR. \*, p< 0.05 and \*\*, p< 0.01, n=3.

**Figure S2. Effect of different signaling inhibitors on COX-2 mRNA expression in RWPE-1 cells.** RWPE-1 cells were incubated with GF109203X (0.5  $\mu$ M), parthenolide (2.5  $\mu$ M), wedelolactone (10  $\mu$ M), BX795 (5  $\mu$ M) or BKM120 (0.3  $\mu$ M) for 16 h and then treated with LPS (5  $\mu$ g/ml, 4 h). COX-2 mRNA levels were determined by Q-PCR, and data normalized to LPS, no inhibitor. Results were expressed as mean  $\pm$  S.D. of triplicate measurements. \*, p< 0.05 and \*\*, p< 0.01 vs. LPS, no inhibitor. Similar results were observed in two additional experiments.

**Figure S3. COX-2 inhibition reduced cell viability in RWPE1 cells with PKC $\epsilon$  overexpression and Pten loss.** RWPE1 stables were treated with different doses of COX-2 inhibitors for different time. (A) Effect of NS398 on the cell viability as determined by MTT assay. (B) Effect of rofecoxib on the cell viability as determined by MTT assay. \*, p< 0.05 and \*\*, p< 0.01, n=3.

**Figure S4. COX-2 inhibition impairs PKC $\epsilon$  driven tumorigenicity.** Male athymic nude mice were treated with NF-kB inhibitor, parthenolide or vehicle control (*i.p.*). Following 7 days of the start of the treatment regimen, CaP8-PKC $\epsilon$  cells were injected s.c. into the left flank of the nude mice and tumor growth was monitored. Tumor volume, expressed as mean  $\pm$  S.D. (n= 8 mice/group).

**Figure S5. Rofecoxib could be detected in the plasma of mice fed with the diet.** (A) Rofecoxib levels were determined in the plasma collected from the mice fed with control laboratory or rofecoxib diet using mass spectrometry. (B) Mouse urine samples were collected by using metabolic cages over an 8-hour period. Levels of PGIM (*left*) and PGEM (*right*) were determined by mass spectrometry. Results were normalized with creatinine.

Figure S1

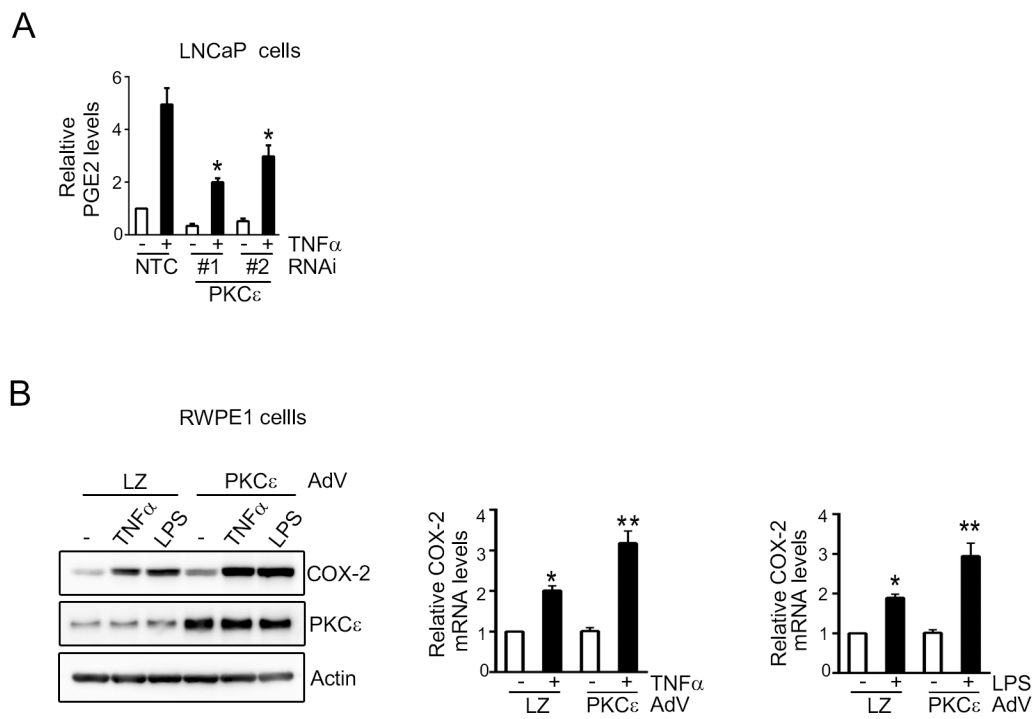

Figure S2

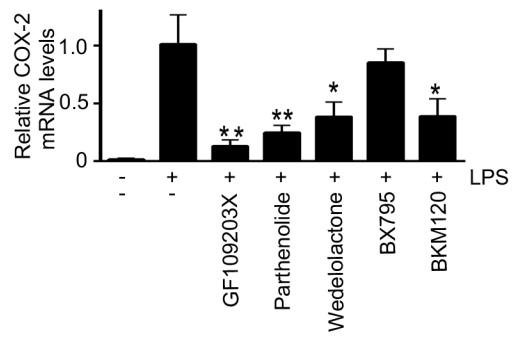

Figure S3

A

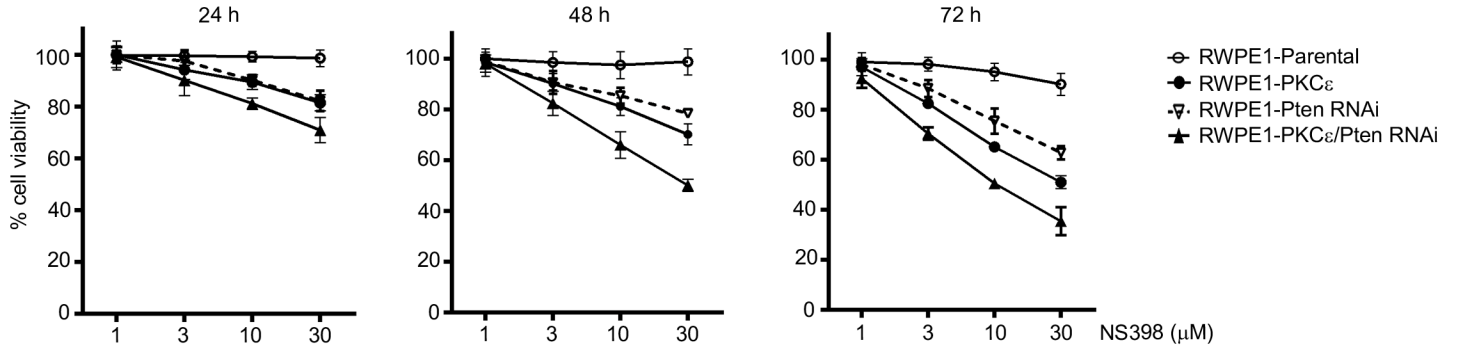

B

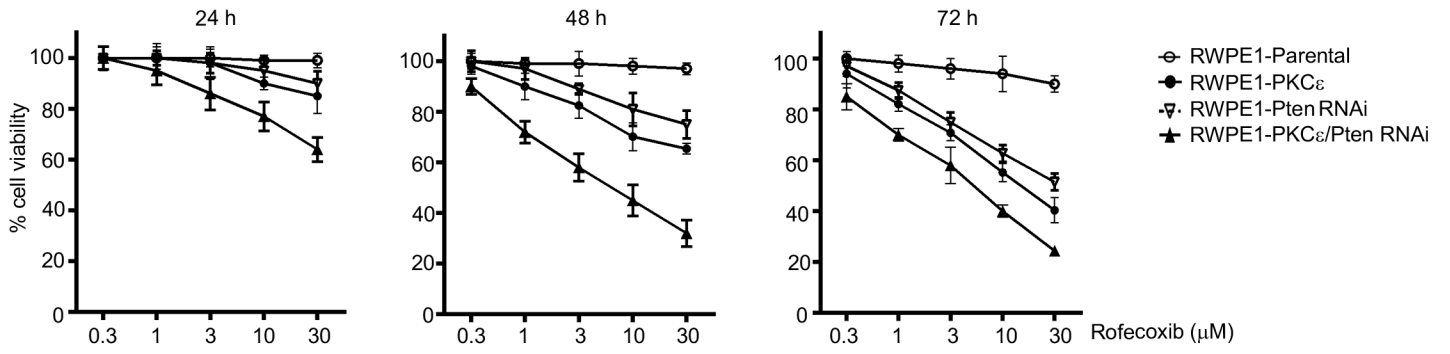

Figure S4

A

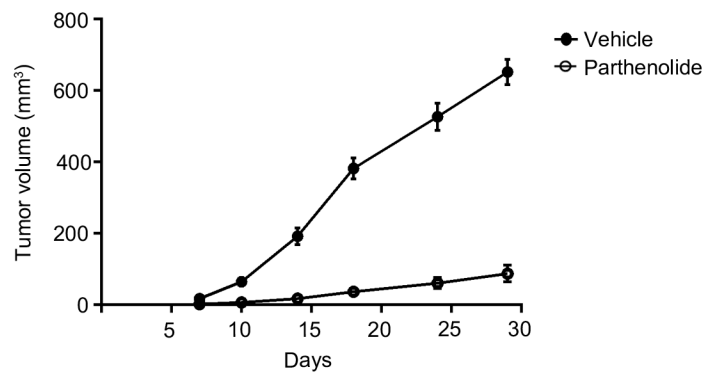

Figure S5

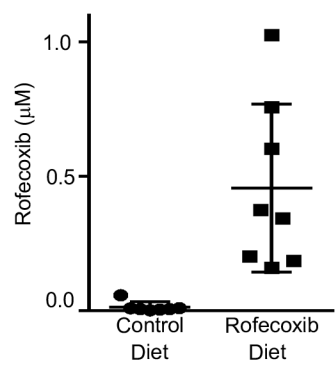

Supplement: NIHMS962496-supplement-1.pdf [file NIHMS962496-supplement-1.pdf]
